# Supplementary material for: Assessing reproducibility and utility of clustering of patients with type 2 diabetes and established CV disease (SAVOR -TIMI 53 trial)
Source: PubMed Central journal article supplement (PMC8604302; doi:10.1371/journal.pone.0259372), 2021-11-19
Supplement: pone.0259372.s005.pdf [file pone.0259372.s005.pdf]

| <b>SAVOR TIMI-53 training dataset (N = 2347)</b> |                |
|--------------------------------------------------|----------------|
| <b>Age of T2D diagnosis (years)</b>              |                |
| min                                              | 40             |
| max                                              | 95             |
| mean (sd)                                        | 64.36 ± 9.22   |
| mean (sd) of log transformed                     | 4.15 ± 0.15    |
| <b>HbA1c (%)</b>                                 |                |
| min                                              | 4.3            |
| max                                              | 14.5           |
| mean (sd)                                        | 7.73 ± 1.32    |
| mean (sd) of log transformed                     | 2.03 ± 0.16    |
| <b>BMI (kg/m<sup>2</sup>)</b>                    |                |
| min                                              | 18.51071       |
| max                                              | 49.84044       |
| mean (sd)                                        | 30.60 ± 5.13   |
| mean (sd) of log transformed                     | 3.41 ± 0.16    |
| <b>FPG (mg/dL)</b>                               |                |
| min                                              | 55             |
| max                                              | 409            |
| mean (sd)                                        | 152.22 ± 47.31 |
| mean (sd) of log transformed                     | 4.98 ± 0.29    |
| <b>f-Insulin (pmol/L)</b>                        |                |
| min                                              | 13.99          |
| max                                              | 396            |
| mean (sd)                                        | 98.90 ± 68.04  |
| mean (sd) of log transformed                     | 4.38 ± 0.67    |
